# Supplementary material
Source: PubMed Central journal article supplement (PMC9843707)
Supplement: NIHMS1858726-supplement-supplementary_material.pdf [file NIHMS1858726-supplement-supplementary_material.pdf]

# Supplementary Material

## Sex Differences of the Phosphoproteomic Profiles in APP/PS1 Mice after Chronic Unpredictable Mild Stress

| <b><u>Stressor</u></b>       | <b><u>Duration</u></b> |
|------------------------------|------------------------|
| No bedding                   | 2 hours                |
| Wet Bedding                  | 2 hours                |
| Cage Tilt                    | 2 hours                |
| Restraint                    | 1 hour                 |
| Cold Water Swim              | 3 minutes              |
| Food Deprivation             | 8 hours                |
| Water Deprivation            | 8 hours                |
| Isolation                    | Overnight              |
| Light/Dark Cycle Alternation | 2 days                 |

**Supplementary Figure 1. Timings of Stressors in our Chronic Unpredictable Mild Stress Model.** A table of the stressors used for our chronic unpredictable stress model along with the duration of each stressor.

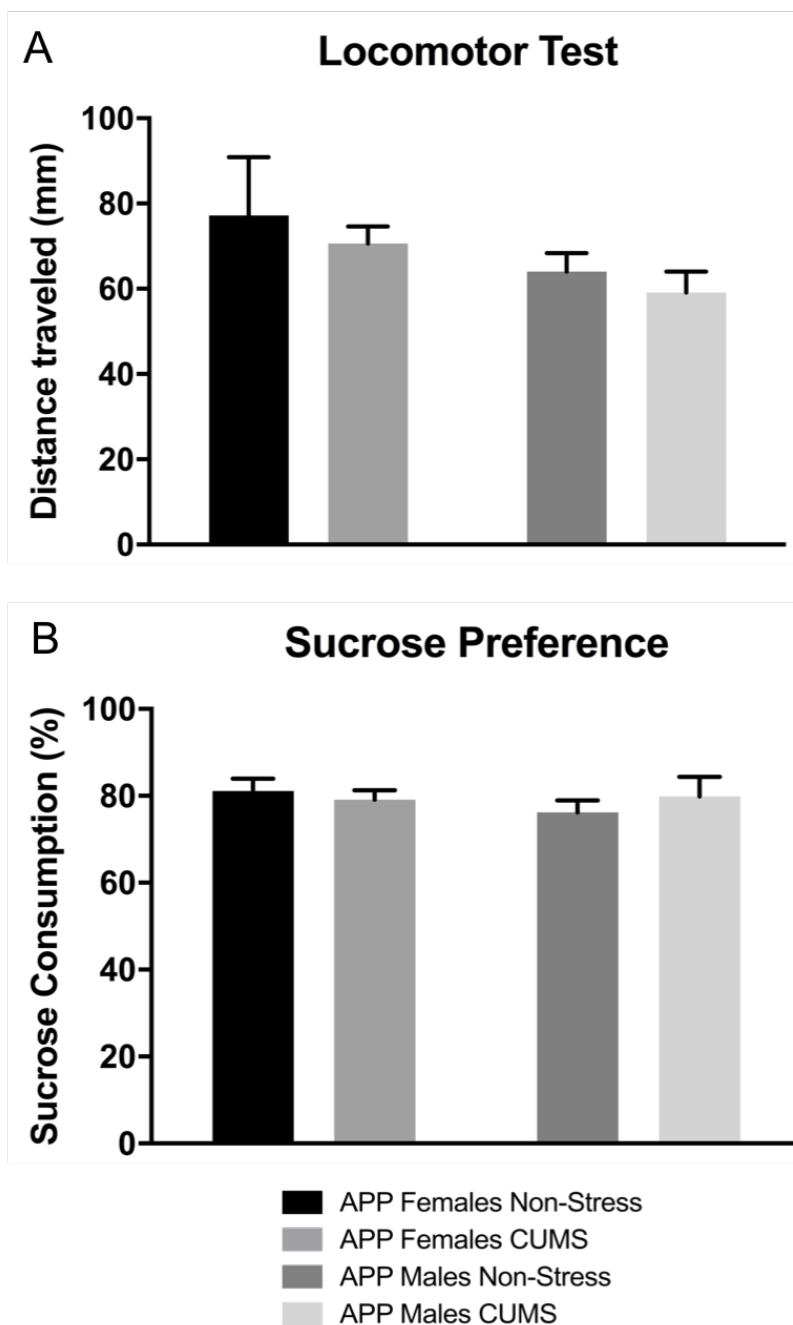

**Supplementary Figure 2. Additional Behavioral Assessments.** A) Locomotor test, showed no significant differences between sex or stress-condition in terms of total distance traveled. B) Sucrose preference, showed no significant differences among conditions or sexes in terms of amount of sucrose consumed, shown in percent of total consumption, as there was an overwhelming preference for sucrose water suggesting little anhedonia in any group.

**Enriched motifs for significant phospho-peptides in male cohort**

| Motifs                                                 | Total size | Selection size | Category size | Intersection size | Enrichment factor | P value  | Benj. Hoch. | FDR |
|--------------------------------------------------------|------------|----------------|---------------|-------------------|-------------------|----------|-------------|-----|
| Calmodulin-dependent protein kinase II substrate motif | 27161      | 841            | 5919          | 227               | 1.2386            | 4.53E-05 | 0.001617    |     |
| WW domain binding motif                                | 27161      | 841            | 11300         | 402               | 1.1489            | 3.17E-05 | 0.001617    |     |
| GSK-3, ERK1, ERK2, CDK5 substrate motif                | 27161      | 841            | 11300         | 402               | 1.1489            | 3.17E-05 | 0.001617    |     |
| Casein kinase I substrate motif                        | 27161      | 841            | 3063          | 65                | 0.68536           | 0.000124 | 0.003313    |     |
| Aurora-A kinase substrate motif                        | 27161      | 841            | 290           | 21                | 2.3387            | 0.00019  | 0.004073    |     |
| 14-3-3 domain binding motif                            | 27161      | 841            | 4923          | 188               | 1.2333            | 0.000237 | 0.004219    |     |
| PKC epsilon kinase substrate motif                     | 27161      | 841            | 1365          | 62                | 1.4669            | 0.000645 | 0.009861    |     |
| PAK2 kinase substrate motif                            | 27161      | 841            | 1144          | 53                | 1.4962            | 0.000942 | 0.012595    |     |
| PKC kinase substrate motif                             | 27161      | 841            | 11620         | 395               | 1.0978            | 0.00128  | 0.015222    |     |
| ERK1,2 kinase substrate motif                          | 27161      | 841            | 9954          | 341               | 1.1064            | 0.001725 | 0.018458    |     |

**Enriched motifs for significant phospho-peptides in female cohort**

| Motifs                                                 | Total size | Selection size | Category size | Intersection size | Enrichment factor | P value  | Benj. Hoch. | FDR |
|--------------------------------------------------------|------------|----------------|---------------|-------------------|-------------------|----------|-------------|-----|
| WW domain binding motif                                | 27161      | 909            | 11300         | 435               | 1.1503            | 1.52E-05 | 0.00081463  |     |
| GSK-3, ERK1, ERK2, CDK5 substrate motif                | 27161      | 909            | 11300         | 435               | 1.1503            | 1.52E-05 | 0.00081463  |     |
| Calmodulin-dependent protein kinase II substrate motif | 27161      | 909            | 5919          | 236               | 1.1914            | 0.000307 | 0.010965    |     |
| MAPKAPK2 kinase substrate motif                        | 27161      | 909            | 4490          | 183               | 1.2178            | 0.000507 | 0.012601    |     |
| ERK1,2 kinase substrate motif                          | 27161      | 909            | 9954          | 373               | 1.1197            | 0.000589 | 0.012601    |     |
| 14-3-3 domain binding motif                            | 27161      | 909            | 4923          | 197               | 1.1957            | 0.000726 | 0.012941    |     |
| Casein kinase I substrate motif                        | 27161      | 909            | 3063          | 77                | 0.75115           | 0.000882 | 0.013483    |     |
| MAPKAPK1 kinase substrate motif                        | 27161      | 909            | 1170          | 57                | 1.4557            | 0.001141 | 0.015255    |     |

**Supplementary Table 1. Motif Analysis.** Sustained motif sequences for males and females individually were identified and the top motifs per sex are shown.
